# Supplementary material for: The N-Terminal Region of Yeast Protein Phosphatase Ppz1 Is a Determinant for Its Toxicity
Source: MDPI journal article supplement (doi:10.3390/ijms21207733), 2020-10-19
Supplement: s1 [file s1]

**Table S1. Oligonucleotides used in this work**

| Name                    | Sequence                                                                | Use                                                                          |
|-------------------------|-------------------------------------------------------------------------|------------------------------------------------------------------------------|
| OMLM3                   | CGGGATCCAAAATGGGTAATTCAAGTTCAAAATC                                      | Amplification of C-terminally HA-tagged <i>PPZ1</i> ORF                      |
| OMLM4                   | TGCACTGCAGTTACTGTTGAGATTCGTTATCATTTG                                    | Amplification of untagged <i>PPZ1</i> ORF                                    |
| OMLM7                   | GGTACCATGGGTAATTCCGG                                                    | Amplification of <i>PPZ2</i> ORF and C-terminally HA-tagged <i>PPZ2</i> ORFs |
| OMLM8                   | CTCCTGCAGCGATTGGCTAATTTACG                                              | Amplification of <i>PPZ2</i> and N-terminally HA-tagged <i>PPZ2</i> ORFs     |
| OMLM9                   | CGGGATCCAAAATGGCTAATTCAAGTTCAAAATCTTCGAAA                               | Amplification of untagged <i>PPZ1</i> <sup>G2A</sup> variant                 |
| OMLM11                  | TGACTGCAGTTATTTTTTCTTTCTACCCCCAGC                                       | Amplification of N-terminally HA-tagged <i>GLC7</i> ORF                      |
| HA_PPZ2_Fw_KpnI         | CTCGGTACCATGTACCCATACGATGTTCCAGATTACGCTGGTAATTCC<br>GGTTCGAAACAAC       | Amplification of N-terminally HA-tagged <i>PPZ2</i> ORF                      |
| HA_GLC7_Fw_BamHI        | CGGGATCCATGTACCCATACGATGTTCCAGATTACGCTGACTCACAAC<br>CAGTTGACG           | Amplification of N-terminally HA-tagged <i>GLC7</i> ORF                      |
| OCCP1                   | TGCACTGCAGTTAAGCGTAATCTGGAACATCGTATGGATACTGTTGAG<br>ATTCGTTATCATTTG     | Amplification of C-terminally HA-tagged <i>PPZ1</i> ORF                      |
| OCCP2                   | TGCACTGCAGTTAAGCGTAATCTGGAACATCGTATGGATAGCGATTGG<br>CTAATTTACG          | Amplification of C-terminally HA-tagged <i>PPZ2</i> ORF                      |
| PPZ2_Cter_BspEI_Fw      | AGTCCGGAGTCGAAATGAAAAGGAAAAAACC                                         | Generation of pCM190-PPZ1:2-HA                                               |
| PPZ2_Nter_BspEI_Rv      | AGTCCGGACATAGTATTAGTCCTAGATCCATTATC                                     | Generation of pCM190-PPZ2:1-HA                                               |
| PPZ1_Fw_-470_KpnI       | ATGGTACCAACTCAAGGAGAAGGGCA                                              | Amplification of the <i>PPZ1-GFP</i> ORF                                     |
| EGFP_mCherry_Rv_HindIII | ATAAGCTTCTGTTATCCCTAGCGGATCT                                            | Amplification of the <i>PPZ1-GFP</i> ORF                                     |
| Ppz1 G2A_Fw             | CTTTCCTTCCTTTTCAAATGGCTAATTCAAGTTCAAAATCTTCGAAA                         | Quickchange mutation of Gly2 to Ala from <i>PPZ1-GFP</i>                     |
| Ppz1 G2A_Rv             | TTTCGAAGATTTTGAACCTGAATTAGCCATTTTGAAAAGGAAGGAAAG                        | Quickchange mutation of Gly2 to Ala from <i>PPZ1-GFP</i>                     |
| S3_Ppz1_Ct_Fluo_Fw      | CAGCAAATGATGGAAACAAGCATCACAAATGATAACGAATCTCAACAG<br>CGTACGCTGCAGGTCGAC  | Construction of strain DVS001                                                |
| S2_Ppz1_Ct_Fluo_Rev     | ATGAAATAATGAATATAATACTTCTGGATTTTTTAGTCAGTAAATTTA<br>ATCGATGAATTCGAGCTCG | Construction of strain DVS001                                                |
